# Supplementary material
Source: MDPI journal article supplement (https://www.mdpi.com/2227-7102/12/9/629)
Supplement: s1 [file s1]

## Supplementary Material—The List of Studies Reviewed and Coding Schemes (Tables S1 – S4)

### The role of Mathematics in STEM classrooms: a literature review

#### The List of Reviewed Studies

1. Bautista, N., Diekman, A. y Fuesting, M. (2018). Why Not STEM? Communal experiences motivate students to pursue STEM careers. *The Science Teacher*, 86(3), 46–52. <https://www.jstor.org/stable/26611966>
2. Chuasontia, I. y Sirirat, T. (2021). Designing an instructional module to teach light diffraction by a grating to secondary students applying a STEM-integrated approach. *Physics Education*, 56(4), 45011. <https://doi.org/10.1088/1361-6552/abf69a>
3. Daman Huri, N. H. y Karpudewan, M. (2019). Evaluating the effectiveness of Integrated STEM-lab activities in improving secondary school students' understanding of electrolysis. *Chemistry Education Research and Practice*, 20(3), 495–508. <https://doi.org/10.1039/C9RP00021F>
4. Dasgupta, C., Magana, A. J. y Vieira, C. (2019). Investigating the affordances of a CAD enabled learning environment for promoting integrated STEM learning. *Computers & Education*, 129, 122–142. <https://doi.org/10.1016/j.compedu.2018.10.014>
5. Duygu Sönmez y S. Asli Özgün-Koca (2020). An Integrated Biology & Mathematics Activity to Investigate Photosynthesis & Linear Relationships. *The American Biology Teacher*, 82(7), 488–493. <https://doi.org/10.1525/abt.2020.82.7.488>
6. Goovaerts, L., Cock, M. de, Struyven, K. y Dehaene, W. (2019). Developing a Module to Teach Thermodynamics in an Integrated Way to 16 Year Old Pupils. *European Journal of STEM Education*, 4(1). <https://doi.org/10.20897/ejsteme/3964>
7. Hacıoğlu, Y. y Dönmez Usta, N. (2020). Digital game design-based STEM activity: Biodiversity example. *Science Activities*, 57(1), 1–15. <https://doi.org/10.1080/00368121.2020.1764468>
8. Khozali, N. B. y Karpudewan, M. (2020). An Interdisciplinary Facebook Incorporated STEM Education Strategy in Teaching and Learning of Dynamic Ecosystems. *Eurasia Journal of Mathematics, Science and Technology Education*, 16(11), em1902. <https://doi.org/10.29333/ejmste/8704>
9. Lawrimore, C. y Surber, E. (2018). Graph It Out! Create Graphing Manipulatives to Explore Evolutionary Selection: A Lesson for High School Biology Students. *Proceedings of the Interdisciplinary STEM Teaching and Learning Conference*, 2(1). <https://doi.org/10.20429/stem.2018.020111>
10. Ng, O.-L. y Chan, T. (2019). Learning as Making: Using 3D computer-aided design to enhance the learning of shape and space in STEM-integrated ways. *British Journal of Educational Technology*, 50(1), 294–308. <https://doi.org/10.1111/bjet.12643>
11. Pérez, A., Braaten, B. y MacConnell, R. (2019). Closing the Circuit on Function Concepts. *The Mathematics Teacher*, 112(5), 366–373. <https://doi.org/10.5951/mathteacher.112.5.0366>
12. Wan, A. y Ivy, J. (2021). It's a Wrap: A New Dimension for Sinusoids. *The Mathematics Teacher*, 114(6), 473–476. <https://doi.org/10.5951/MTLT.2020.0217>

13. Wang, L. y Chiang, F.-K. (2020). Integrating novel engineering strategies into STEM education: APP design and an assessment of engineering-related attitudes. *British Journal of Educational Technology*, 51(6), 1938–1959. <https://doi.org/10.1111/bjet.13031>
14. Yasin, A. I., Prima, E. C. y Sholihin, H. (2018). Learning Electricity using Arduino-Android based Game to Improve STEM Literacy. *Journal of Science Learning*, 1(3), 77. <https://doi.org/10.17509/jsl.v1>

### **Coding Schemes**

**Table S1.** Coding scheme for study characteristics and research methodologies of the studies reviewed.

| Category                    | Codes                                              | Short Description, if necessary                                                           |
|-----------------------------|----------------------------------------------------|-------------------------------------------------------------------------------------------|
| Number                      | -                                                  | Articles in alphabetical order (from 1 to 14)                                             |
| Publication details         | -                                                  | Names of author and co-authors                                                            |
| Publication year            | -                                                  | Year of publication                                                                       |
| Country of authors          | -                                                  | Country of the institutions or universities the author(s) are affiliated                  |
| Publication type            | J                                                  | Paper in journal                                                                          |
|                             | C                                                  | Paper in monograph                                                                        |
|                             | N                                                  | Paper out of a journal                                                                    |
| Type of Journal             | 1                                                  | Journal that can be assigned primarily to mathematical education                          |
|                             | 2                                                  | Journal that can be assigned primarily to science education                               |
|                             | 3                                                  | Journal that can be assigned primarily to technology education                            |
|                             | 4                                                  | Journal that can be assigned primarily to engineering education                           |
|                             | 5                                                  | Journal that can be assigned primarily to STEM education                                  |
|                             | M                                                  | Journal that can be assigned primarily to mixed education                                 |
|                             | 0                                                  | Journal that does not fit in one of the upper categories                                  |
| Target group of the journal | T                                                  | The primary target group of the Journal are teacher                                       |
|                             | R                                                  | The primary target group of the Journal are researchers                                   |
| Empirical approach          | Qualitative                                        | Usage of qualitative methods reported by authors                                          |
|                             | Quantitative                                       | Usage of quantitative methods reported by authors                                         |
|                             | Usage of both qualitative and quantitative methods | Usage of qualitative and quantitative methods jointly, but not called mixed-methods study |

|                     |                                          |                                                                       |
|---------------------|------------------------------------------|-----------------------------------------------------------------------|
|                     | Design-based research or research design | Usage of design-based research or research design reported by authors |
|                     | Experimental research                    | Usage of experimental research reported by authors                    |
|                     | Not mentioned                            | No information about methods provided by authors                      |
| Sample/participants | -                                        | Grade in Number                                                       |
| Grade               | 0                                        | No information provided                                               |
| Sample size         | -                                        | participants of the study                                             |
|                     | Not mentioned                            | No information provided                                               |

**Table S2.** Coding scheme for educational settings and approaches.

| Category                      | Codes | Short Description, if necessary                                                              |
|-------------------------------|-------|----------------------------------------------------------------------------------------------|
| Setting of the implementation | 1     | Implementation of the STEM unit as Project e.g. (Field, trip, project week, ...)             |
|                               | 2     | Implementation of the STEM unit in regular classroom setting                                 |
|                               | 0     | No information provided                                                                      |
| Setting of the topic          | 1     | Implementation as a project-based unit                                                       |
|                               | 2     | Implementation of the STEM unit in regular classroom setting                                 |
|                               | 0     | No information provided                                                                      |
| Approaches according to Hobbs | 1     | Implementation of the STEM unit in an integrated approach                                    |
|                               | 2     | Implementation of the STEM unit in a separated approach                                      |
|                               | 3     | Implementation of the STEM unit while emphasizing on or two disciplines                      |
|                               | 4     | Implementation of the STEM unit by Integrate one into others without Lining the others [3.M] |
|                               | 5     | Implementation of the STEM that is divided by subjects                                       |

**Table S3.** Coding scheme for the application of mathematics.

| Category                   | Code | Short Description, if necessary                                                                             |
|----------------------------|------|-------------------------------------------------------------------------------------------------------------|
| Application of mathematics | O    | Focus of the application of mathematics is on handling the language, constructs, and tools of mathematics   |
|                            | P    | Focus of the application of mathematics is on posing and answering questions in and by means of mathematics |

|                                                                                             |   |                                                                                                             |
|---------------------------------------------------------------------------------------------|---|-------------------------------------------------------------------------------------------------------------|
| Opportunities in the application of mathematics after small adjustment of material and task | O | Focus of the application of mathematics is on handling the language, constructs, and tools of mathematics   |
|                                                                                             | P | Focus of the application of mathematics is on posing and answering questions in and by means of mathematics |
| Necessity of mathematics                                                                    | 1 | Mathematics is used in the sense of nature of mathematics                                                   |
|                                                                                             | 2 | Mathematics is used as an ancillary discipline                                                              |
| Necessity of mathematics in the authors depiction                                           | 1 | Mathematics is seen in the sense of nature of mathematics in the authors depiction                          |
|                                                                                             | 2 | Mathematics is seen as an ancillary discipline in the authors depiction                                     |

**Table S4.** Sample coding. *Note.* Except for coding “year”, the codes indicate “yes” (1), “no” (0).

| Category                    | Codes                                              | Exemplary Coding                                     |                      |
|-----------------------------|----------------------------------------------------|------------------------------------------------------|----------------------|
| Number                      | -                                                  | 13                                                   | 12                   |
| Publication details         | -                                                  | Yasin, Alifa Irna; Prima, Eka Cahya; Sholihin, Hayat | Ng, Oi-Lam; Chan, To |
| Publication year            | -                                                  | 2018                                                 | 2019                 |
| Country of authors          | -                                                  | Indonesia                                            | Hong Kong            |
| Publication type            | J                                                  | J                                                    | J                    |
|                             | C                                                  |                                                      |                      |
|                             | N                                                  |                                                      |                      |
| Type of Journal             | 1                                                  | 2                                                    | 3                    |
|                             | 2                                                  |                                                      |                      |
|                             | 3                                                  |                                                      |                      |
|                             | 4                                                  |                                                      |                      |
|                             | 5                                                  |                                                      |                      |
|                             | M                                                  |                                                      |                      |
|                             | 0                                                  |                                                      |                      |
| Target group of the journal | T                                                  | R                                                    | R                    |
|                             | R                                                  |                                                      |                      |
| Empirical approach          | Qualitative                                        | Design-based research or research design             |                      |
|                             | Quantitative                                       |                                                      |                      |
|                             | Usage of both qualitative and quantitative methods |                                                      |                      |

|                                                                                                   |                                          |                  |    |
|---------------------------------------------------------------------------------------------------|------------------------------------------|------------------|----|
|                                                                                                   | Design-based research or research design |                  |    |
|                                                                                                   | Experimental research                    |                  |    |
|                                                                                                   | Not mentioned                            |                  |    |
| Sample/participants                                                                               | -                                        | 8                | 8  |
| Grade                                                                                             | 0                                        |                  |    |
| Category                                                                                          | Codes                                    | Exemplary Coding |    |
| Sample size                                                                                       | -                                        | 16               | 50 |
|                                                                                                   | Not mentioned                            |                  |    |
| Setting of the implementation                                                                     | 1                                        | 2                | 2  |
|                                                                                                   | 2                                        |                  |    |
|                                                                                                   | 0                                        |                  |    |
| Setting of the topic                                                                              | 1                                        | 0                | 2  |
|                                                                                                   | 2                                        |                  |    |
|                                                                                                   | 0                                        |                  |    |
| Approaches according to Hobbs                                                                     | 1                                        | 1                | 3  |
|                                                                                                   | 2                                        |                  |    |
|                                                                                                   | 3                                        |                  |    |
|                                                                                                   | 4                                        |                  |    |
|                                                                                                   | 5                                        |                  |    |
| Application of mathematics                                                                        | O                                        | O                | P  |
|                                                                                                   | P                                        |                  |    |
| Apply opportunities in the application of mathematics after small adjustment of material and task | O                                        | P                | P  |
|                                                                                                   | P                                        |                  |    |
| Necessity of mathematics                                                                          | 1                                        | 1                | 1  |
|                                                                                                   | 2                                        |                  |    |
| Necessity of mathematics in the authors depiction                                                 | 1                                        | 2                | 1  |
|                                                                                                   | 2                                        |                  |    |
